# Supplementary material for: Synthetic approach for the control of self-doping in luminescent organic semiconductors
Source: Royal Society of Chemistry journal article supplement (doi:10.1039/d2qm00345g), 2022-01-01
Supplement: d2qm00345g1.pdf [file d2qm00345g1.pdf]

## Electronic Supplementary Information

### Synthetic approach for the control of self-doping in luminescent organic semiconductor

Anatoly D. Kuimov, Christina S. Becker, Nikita A. Shumilov, Igor P. Koskin, Alina A. Sonina, Vladislav Yu. Komarov, Inna K. Shundrina, and Maxim S. Kazantsev

#### 1. Characterization

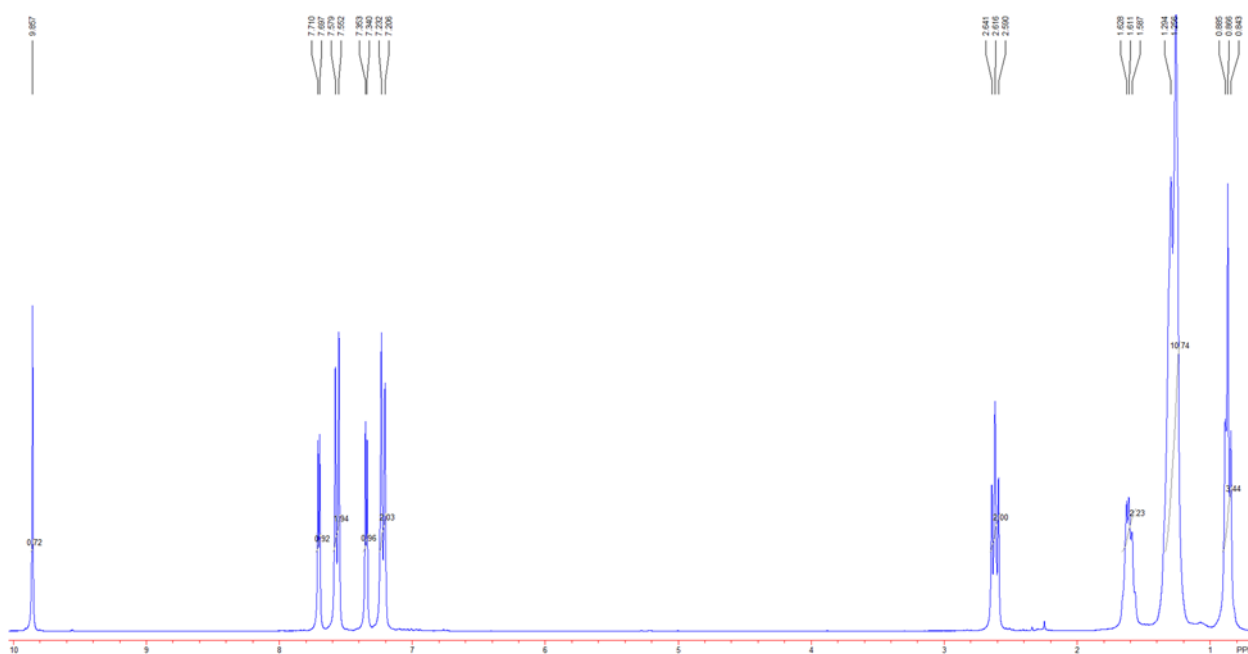

**Figure S1.**  $^1\text{H}$  NMR spectrum of compound **3** in  $\text{CDCl}_3$ .

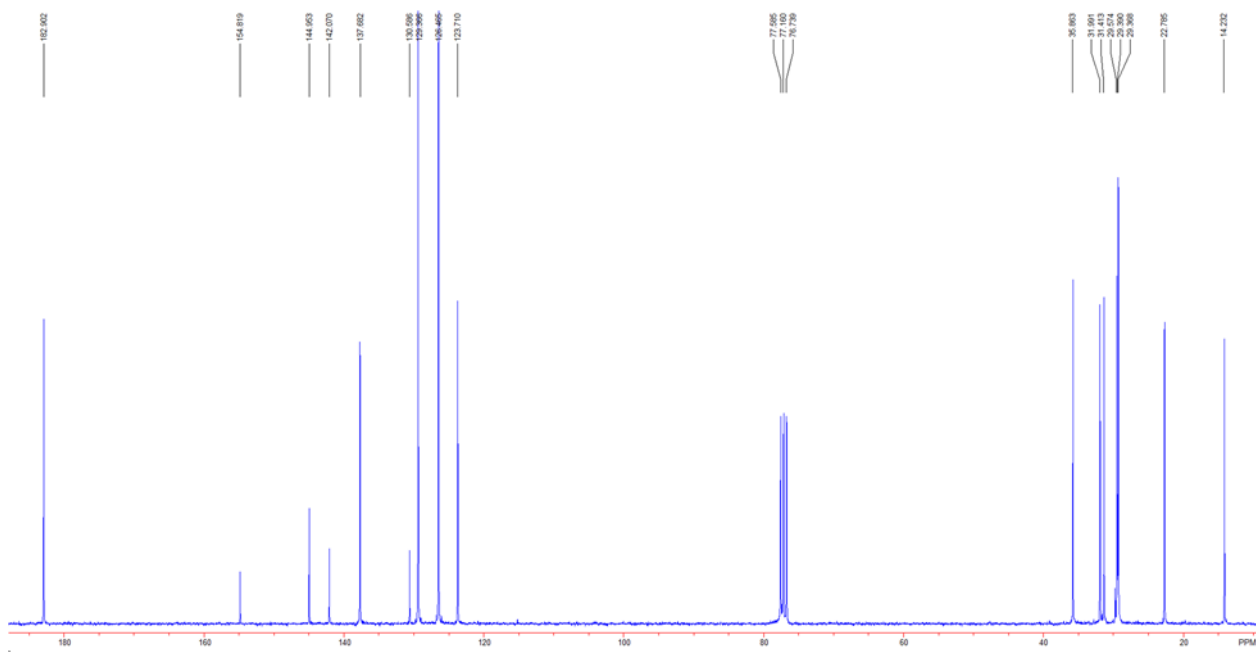

**Figure S2.**  $^{13}\text{C}$  NMR spectrum of compound **3** in  $\text{CDCl}_3$ .

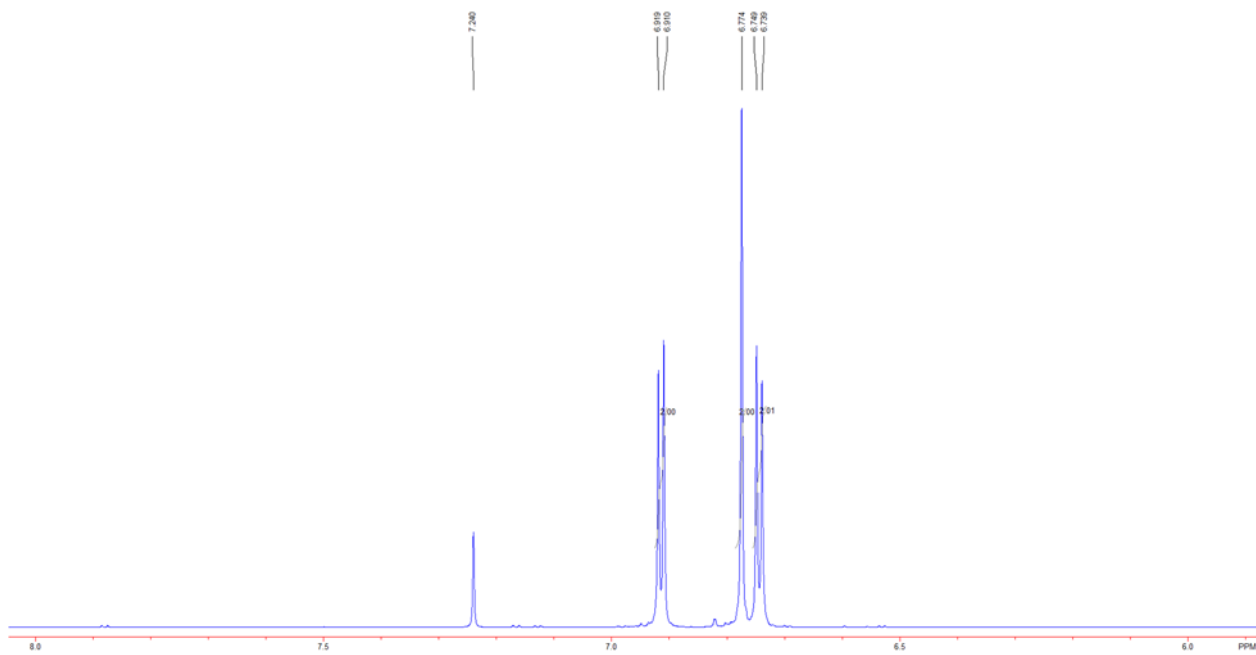

**Figure S3.**  $^1\text{H}$  NMR spectrum of compound **6** in  $\text{CDCl}_3$ .

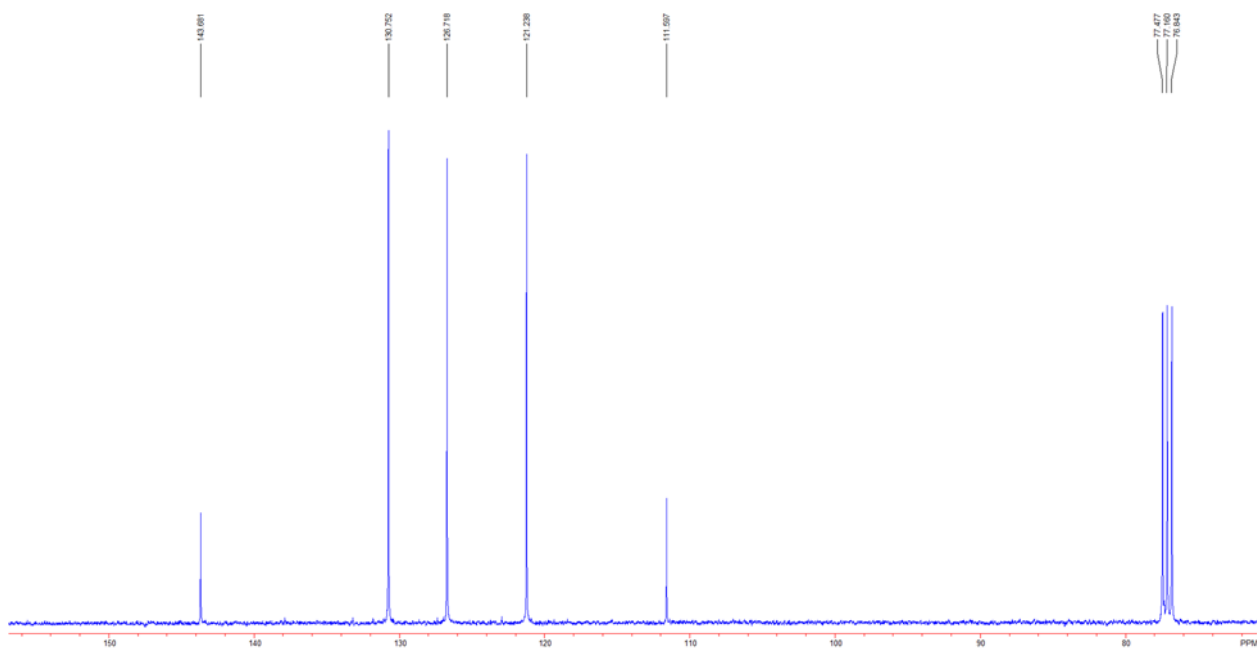

**Figure S4.**  $^{13}\text{C}$  NMR spectrum of compound **6** in  $\text{CDCl}_3$ .

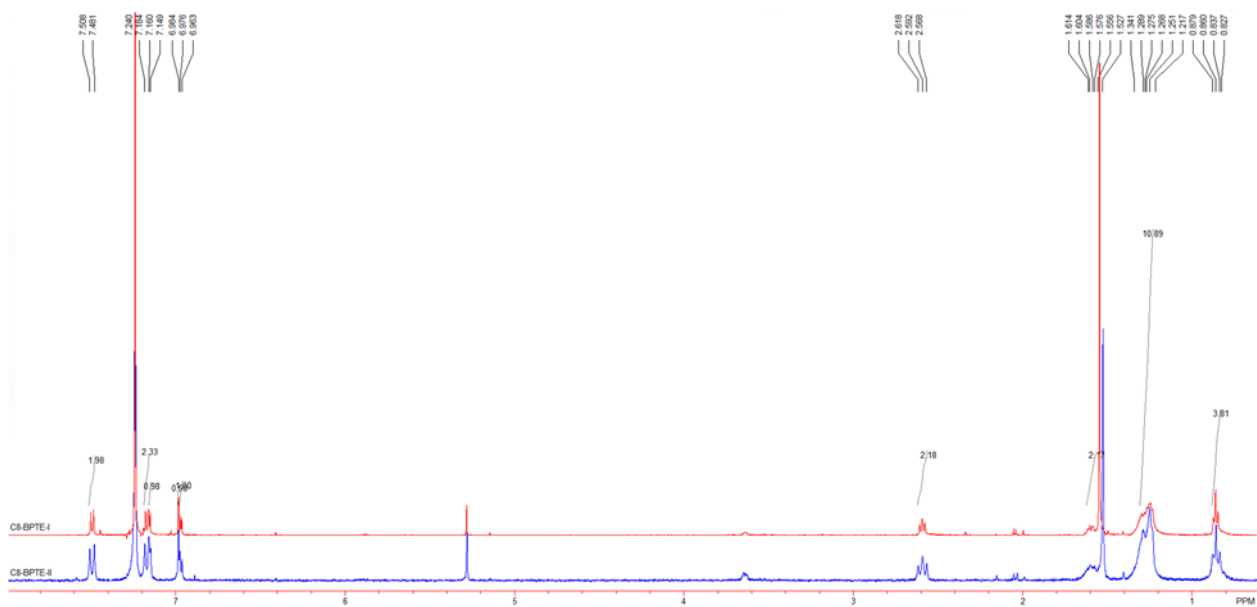

**Figure S5.**  $^1\text{H}$  NMR spectra of compounds **C8-BPTE-I** (red) and **C8-BPTE-II** (blue) in  $\text{CDCl}_3$ .

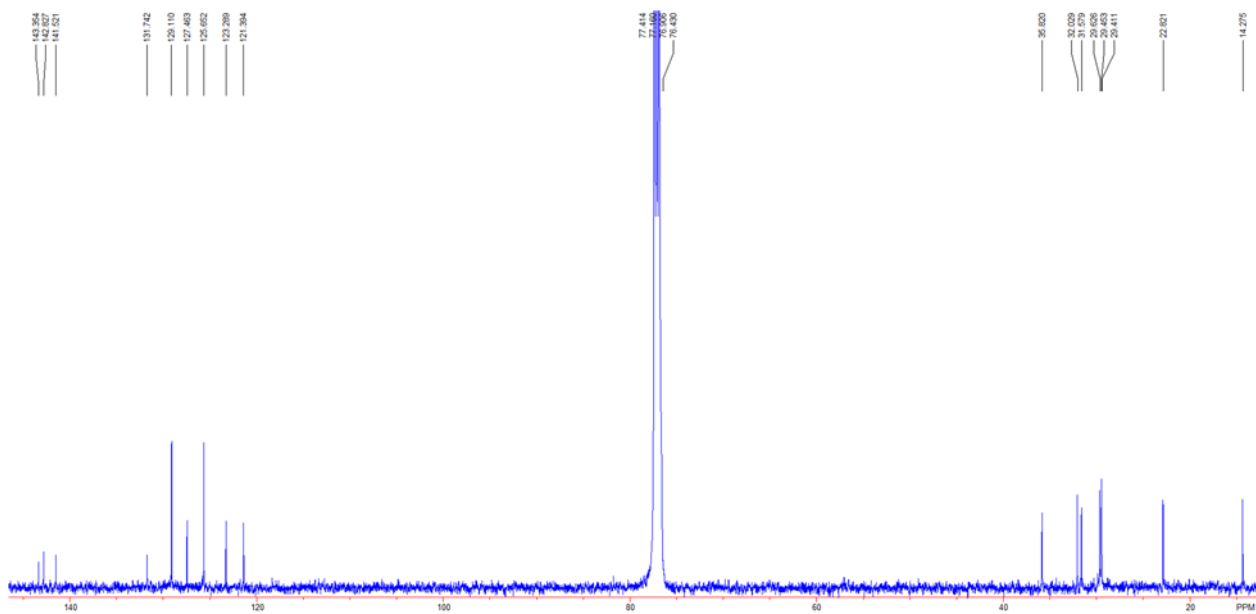

**Figure S6.**  $^{13}\text{C}$  NMR spectrum of compound **C8-BPTE** (batch I) in  $\text{CDCl}_3$ .

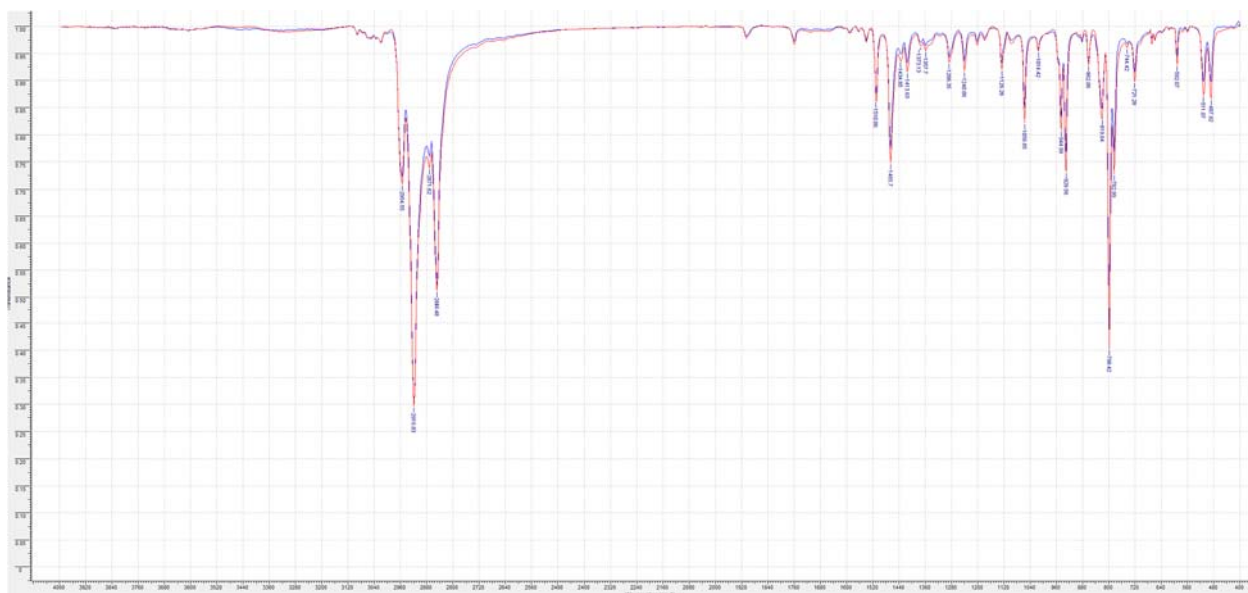

**Figure S7.** IR spectra of compounds **C8-BPTE-I** (red) and **C8-BPTE-II** (blue) in KBr pellets.

k-812\_220304174503 #2 RT: 0.09 AV: 1 NL: 4.14E6  
T: + c EI Full ms [14.50-590.50]

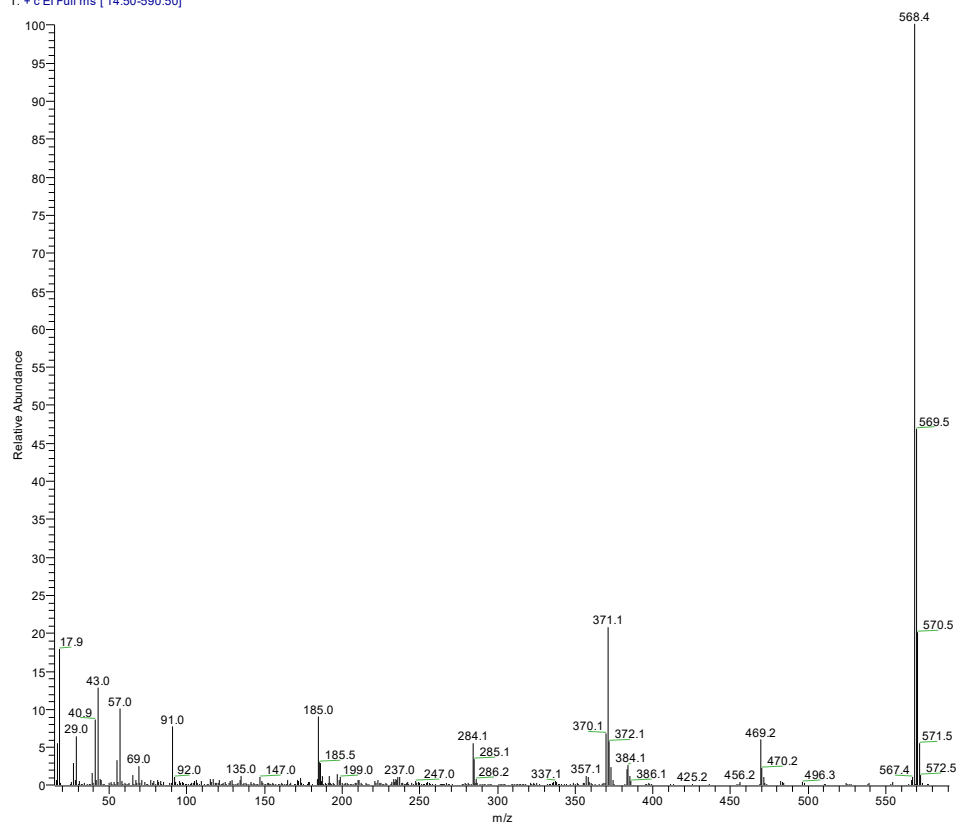

**Figure S8.** HRMS spectrum of compound C8-BPTE (batch I).

K-814a #75 RT: 6.71 AV: 1 NL: 4.35E7  
T: + c EI Full ms [14.50-790.50]

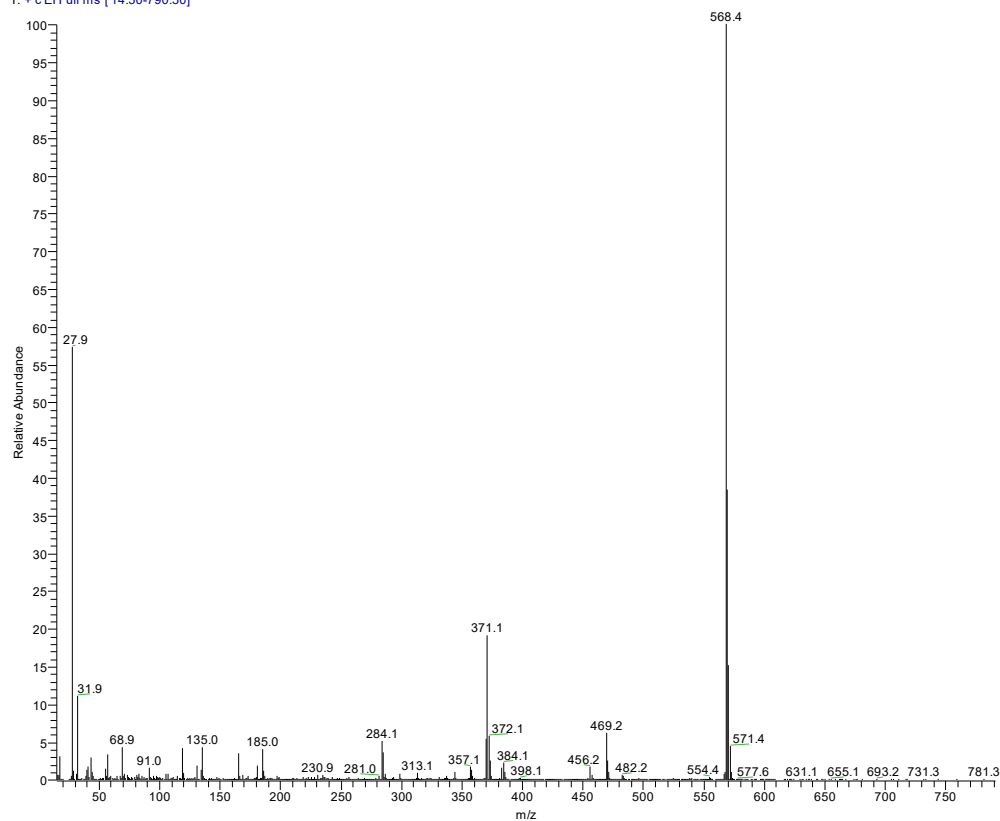

**Figure S9.** HRMS spectrum of compound C8-BPTE (batch II, full scale). Note that high mass region along with C8-BPTET signal (Figure S10) contains minor peaks 781, 731, 693, 655, 631 and some others which may be assigned to the ions of standard used for MS (perfluorokerosene).

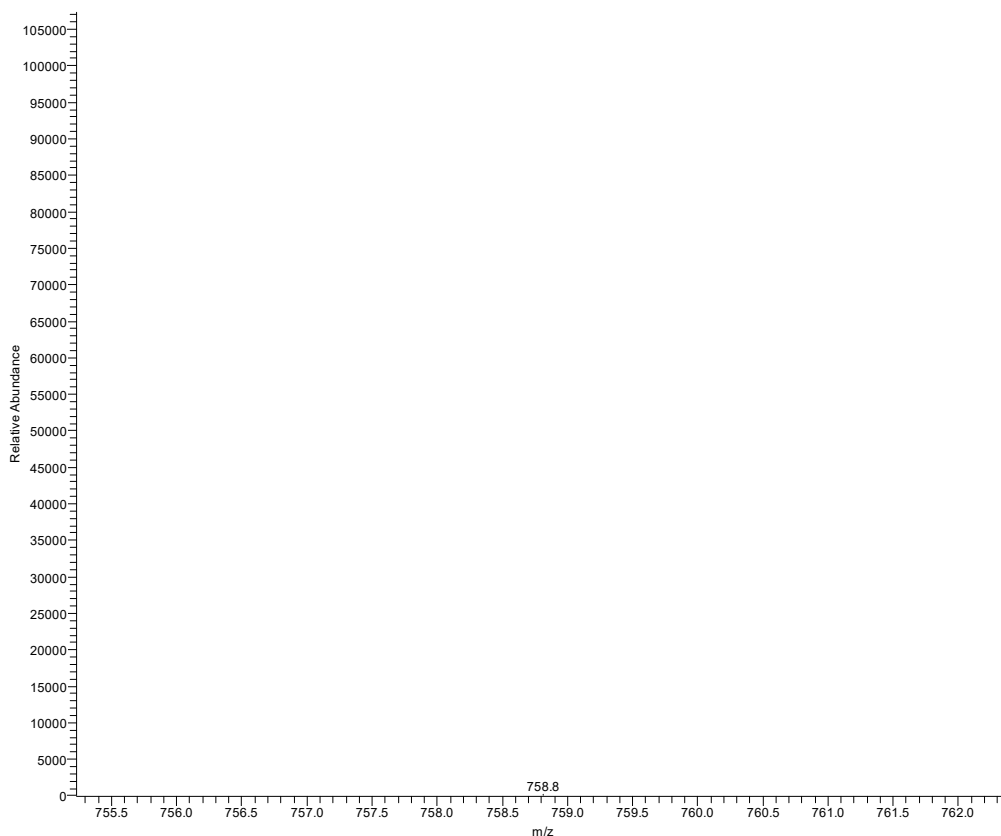

**Figure S10.** HRMS spectrum of compound C8-BPTE (batch II, zoom of high-mass region).

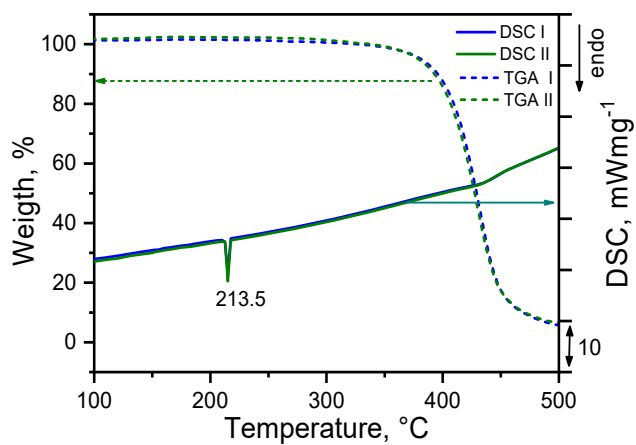

**Figure S11.** Thermal gravimetric and differential scanning calorimetry analyses of C8-BPTE batch I (blue) and batch II (olive) in He atmosphere.

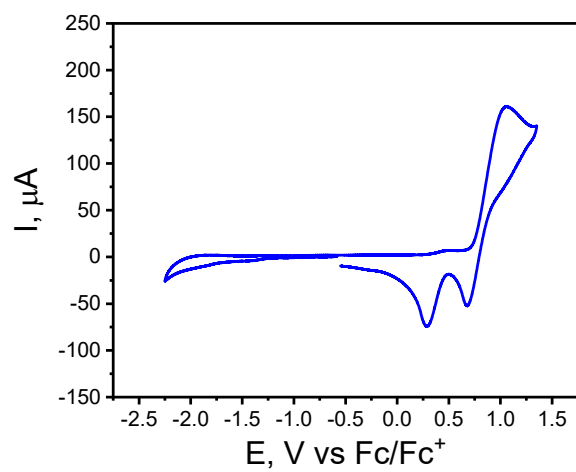

**Figure S12.** Cyclic voltammogram of C8-BPTE (batch I) in  $\text{CH}_2\text{Cl}_2$  solution.

## 2. Quantum chemistry calculations

**Table S1.** Energy of HOMO (in eV) calculated for optimized geometry of Me-BPTE in gas phase utilizing various DFT functionals and basis sets. Percentage value in the parenthesis represents relative discrepancy between calculated and experimentally estimated value of HOMO energy.

| Functional\Basis  | 6-31+G*        | 6-311++G**     | Def2-TZVP      |
|-------------------|----------------|----------------|----------------|
| B3LYP[GD3BJ]      | -5.08 (8.3%)   | -5.14 (7.2%)   | -5.09 (8.1%)   |
| M06-2X            | -6.29 (-13.5%) | -6.34 (-14.4%) | -6.29 (-13.5%) |
| $\omega$ B97-X[D] | -6.89 (-24.4%) | -6.97 (-25.8%) | -6.92 (-24.9%) |

**Table S2.** Energy of electron gap (in eV) calculated for optimized geometry of Me-BPTE in the gas phase utilizing various DFT functionals and basis sets. Percentage value in the parenthesis represents relative discrepancy between calculated and experimentally measured value of electron gap.

| Functional\Basis  | 6-31+G*       | 6-311++G**    | Def2-TZVP     |
|-------------------|---------------|---------------|---------------|
| B3LYP[GD3BJ]      | 2.96 (4.6%)   | 2.99 (5.6%)   | 3.01 (6.4%)   |
| M06-2X            | 5.03 (77.7%)  | 5.06 (78.8%)  | 5.08 (79.5%)  |
| $\omega$ B97-X[D] | 6.59 (132.9%) | 6.62 (133.9%) | 6.63 (134.3%) |

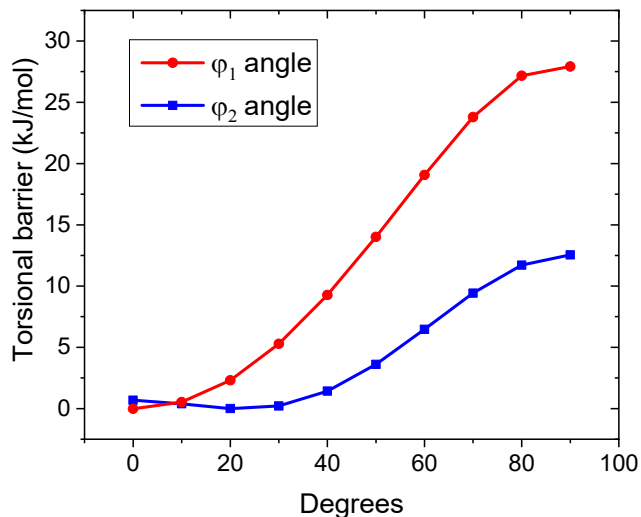

**Figure S13.** Relaxed potential energy surface of Me-BPTE upon rotation around  $\phi_1$  (blue line and squares) and  $\phi_2$  (red line and circles) dihedral angles.



**Table S3.** Absorption energy of  $S_0 \rightarrow S_{1v}$  transition (in nm) calculated for Me-BPTE utilizing various TD-DFT functionals and basis sets. Percentage value in the parenthesis represents relative discrepancy between calculated and experimentally measured value of absorption energy.

| Functional\Basis | Def2-TZVP    | 6-31+G*      | 6-311++G**   |
|------------------|--------------|--------------|--------------|
| PBE0             | 430 (4.9%)   | 429 (4.6%)   | 431 (5.1%)   |
| B3LYP            | 443 (7.7%)   | 443 (7.6%)   | 445 (8.0%)   |
| CAM-B3LYP        | 397 (-3.0%)  | 395 (-3.4%)  | 398 (-2.9%)  |
| LC- $\omega$ PBE | 364 (-12.3%) | 361 (-13.2%) | 363 (-12.6%) |
| M05              | 432 (5.4%)   | 433 (5.5%)   | 434 (5.7%)   |
| TPSSH            | 452 (9.6%)   | 452 (9.5%)   | 454 (9.8%)   |
| X3LYP            | 440 (7.1%)   | 440 (7.1%)   | 442 (7.5%)   |

**Table S4.** Emission energy of  $S_{1r} \rightarrow S_0$  transition (in nm) calculated for Me-BPTE utilizing various TD-DFT functionals and basis sets. Percentage value in the parenthesis represents relative discrepancy between calculated and experimentally measured value of emission energy (brightest emission band).

| Functional\Basis | 6-31+G*      | 6-311++G**   | Def2-TZVP    |
|------------------|--------------|--------------|--------------|
| B3LYP            | 649 (-25.1%) | 652 (-25.4%) | 654 (-25.6%) |
| CAM-B3LYP        | 582 (-16.6%) | 586 (-17.1%) | 586 (-17.0%) |
| PBE0             | 513 (-5.3%)  | 516 (-5.8%)  | 514 (-5.5%)  |
| LC- $\omega$ PBE | 497 (-2.2%)  | 501 (-3.0%)  | 499 (-2.6%)  |

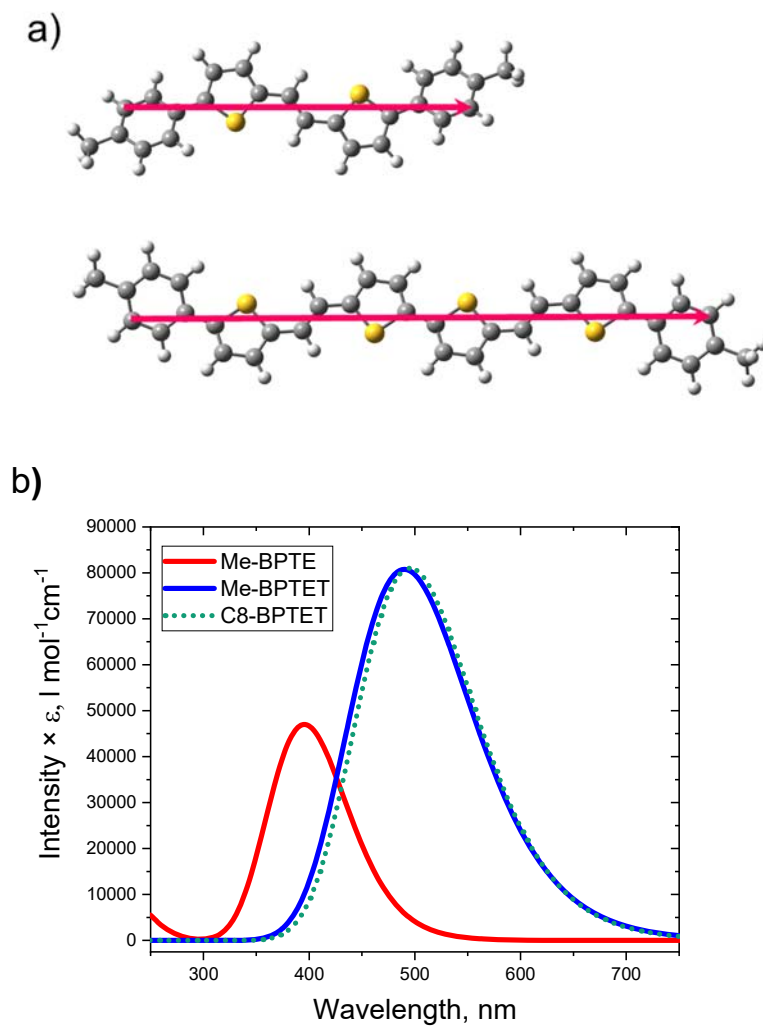

**Figure S14.** (a) Transition dipole moment (red arrow) of Me-BPTE and Me-BPTET depicted ontop of optimized molecular structure; (b) convoluted optical absorption spectra of Me-BPTE (red line), Me-BPTET (blue line) and C8-BPTET (green dotted line).

### 3. X-ray data

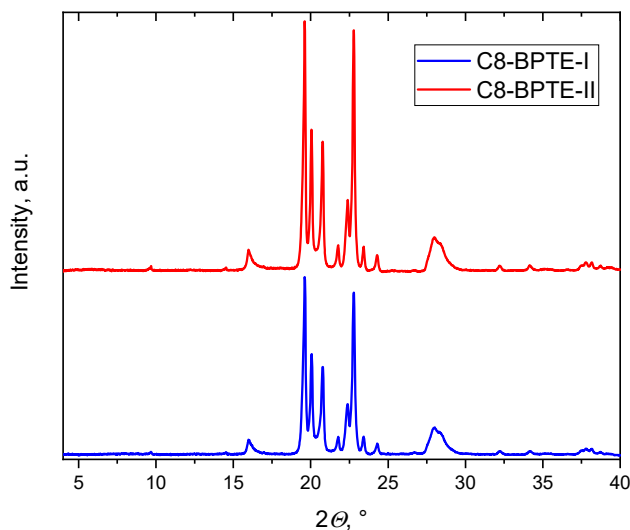

**Figure S15.** Powder X-ray diffraction patterns of C8-BPTE at ambient temperature.

**Table S5.** Crystallographic, structural data and experimental details for (E)-1,2-bis(5-bromothiophen-2-yl)ethene and C8-BPTE.

| Compound                                  | (E)-1,2-bis(5-bromothiophen-2-yl)ethene |                                            | C8-BPTE                                 |
|-------------------------------------------|-----------------------------------------|--------------------------------------------|-----------------------------------------|
| Empirical formula                         | $C_{10}H_6Br_2S_2$                      |                                            | $C_7H_9S$                               |
| Molecular weight                          | 350.09                                  |                                            | 568.88                                  |
| Crystal system,<br>space group            | Monoclinic, $P2_1/c$                    |                                            | Monoclinic, $C2/m$                      |
| Temperature, K                            | 80(3)                                   | 299                                        | 80(3)                                   |
| Deposition number                         | 20220319                                | 2166501                                    | 20220401                                |
| $a, b, c$ (Å)                             | 13.1360(7),<br>5.9520(3),<br>7.3714(4)  | 13.186 (3),<br>6.0106 (11),<br>7.5450 (15) | 7.9829(13),<br>5.3716(10),<br>35.817(6) |
| $\beta$ (°)                               | 102.414(2)                              | 102.762 (5)                                | 92.535(6)                               |
| Volume (Å <sup>3</sup> )                  | 562.86(5)                               | 583.23 (19)                                | 1534.4(5)                               |
| $Z$                                       | 2                                       | 2                                          | 2                                       |
| $D_{\text{calcd.}}$ (g·cm <sup>-3</sup> ) | 2.066                                   | 1.994                                      | 1.231                                   |
| $\mu$ (mm <sup>-1</sup> )                 | 7.53                                    | 7.26                                       | 0.20                                    |
| Crystal size (mm)                         | 0.14 × 0.09 × 0.05                      | 0.66 × 0.36 × 0.16                         | 0.27 × 0.14 × 0.005                     |
| No. of measured,<br>independent and       | 7682, 2140, 2008                        | 4186, 1105, 945                            | 8325, 1524, 1359                        |

|                                                                                     |                                                                        |                                                                      |                                                                      |
|-------------------------------------------------------------------------------------|------------------------------------------------------------------------|----------------------------------------------------------------------|----------------------------------------------------------------------|
| observed [ $I > 2\sigma(I)$ ]<br>reflections                                        |                                                                        |                                                                      |                                                                      |
| $R_{\text{int}}$                                                                    | 0.026                                                                  | 0.051                                                                | 0.056                                                                |
| Range of h, k, l                                                                    | $-20 \leq h \leq 17$ ,<br>$-9 \leq k \leq 9$ ,<br>$-10 \leq l \leq 11$ | $-16 \leq h \leq 16$ ,<br>$-6 \leq k \leq 7$ ,<br>$-9 \leq l \leq 9$ | $-9 \leq h \leq 9$ ,<br>$-6 \leq k \leq 6$ ,<br>$-42 \leq l \leq 42$ |
| $R[F^2 > 2\sigma(F^2)]$ ,<br>$wR(F^2)$ , $S$                                        | 0.016, 0.040, 1.09                                                     | 0.027, 0.072, 1.05                                                   | 0.121, 0.394, 1.26                                                   |
| No. of parameters                                                                   | 64                                                                     | 64                                                                   | 147                                                                  |
| No. of restraints                                                                   | 0                                                                      | 0                                                                    | 167                                                                  |
| $\Delta\rho_{\text{max}}$ , $\Delta\rho_{\text{min}}$ ( $\text{e}\text{\AA}^{-3}$ ) | 0.44/-0.39                                                             | 0.30/-0.63                                                           | 0.56/-0.75                                                           |

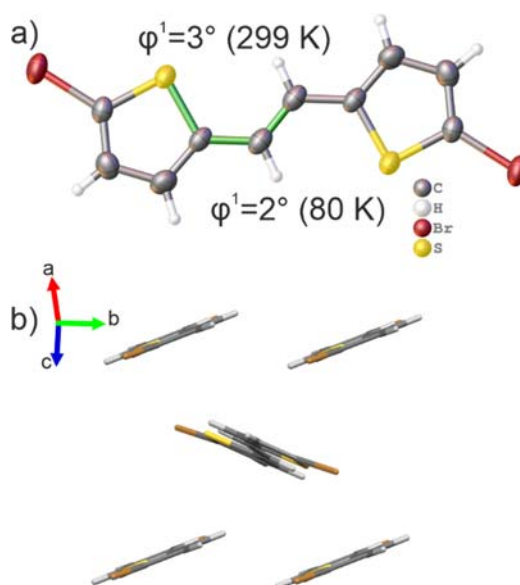

**Figure S16.** Molecular structure with torsional angle  $\varphi^1$  at 299 K and 80 K (a) and fragment of crystal structure (b) of (E)-1,2-bis(5-bromothiophen-2-yl)ethene. The arrows indicate the orientation of crystallographic axes.

#### 4. OFET Data

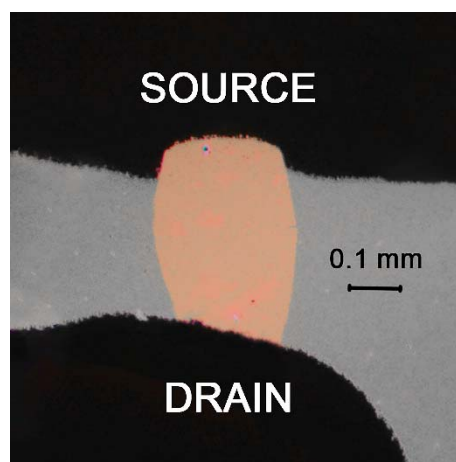

Figure S17. Optical image of C8-BPTE OFET.

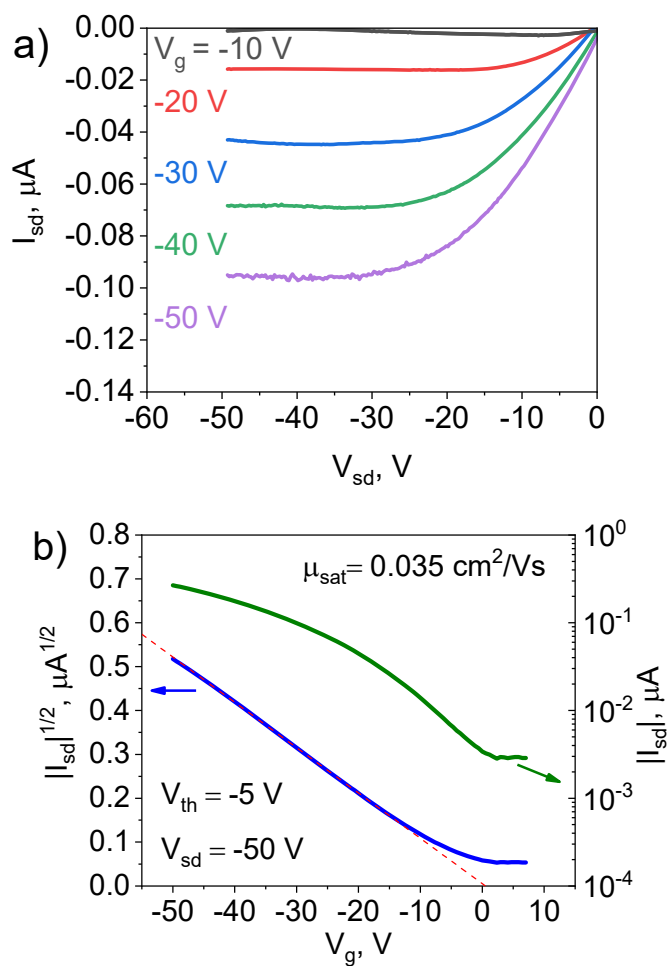

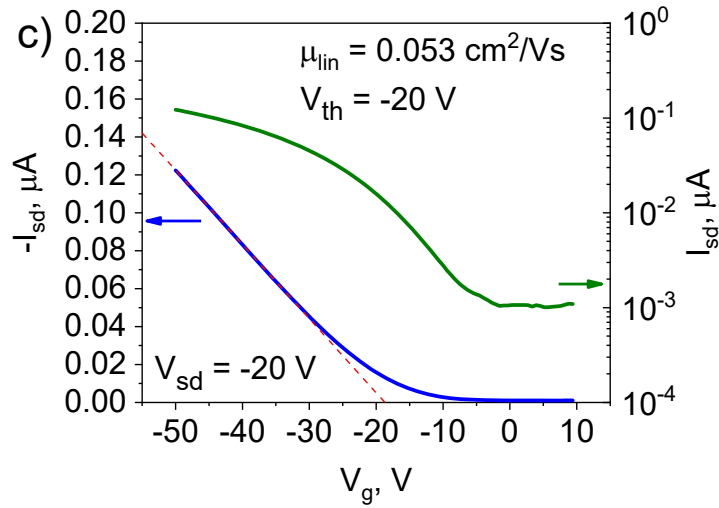

**Figure S18.** Output (a) and transfer characteristics in saturation (b) and linear (c) regimes of C8-BPTE (batch II) single crystal OFET.

**Table S6.** Charge transport parameters of C8-BPTE (Batch I and Batch II) OFETs.

|         | Sample | W/L  | $\mu_{\text{sat}}, \text{cm}^2/\text{Vs}$ | $V_{\text{th}}^{\text{sat}}, \text{V}$ | $\mu_{\text{lin}}, \text{cm}^2/\text{Vs}$ | $V_{\text{th}}^{\text{lin}}, \text{V}$ |
|---------|--------|------|-------------------------------------------|----------------------------------------|-------------------------------------------|----------------------------------------|
| Batch I | 1.     | 0.87 | 0.059                                     | 0                                      | 0.033                                     | -28                                    |
|         | 2.     | 0.95 | 0.08                                      | -4                                     | 0.067                                     | -21                                    |
|         | 3.     | 0.62 | 0.051                                     | -3                                     | 0.053                                     | -20                                    |
|         | 4.     | 0.87 | 0.021                                     | 0                                      | 0.019                                     | -20                                    |
|         | 5.     | 1.1  | 0.031                                     | -8                                     | 0.032                                     | -29                                    |
|         | 6.     | 1    | 0.073                                     | -3                                     | 0.063                                     | -31                                    |
|         | 7.     | 1.07 | 0.023                                     | -7                                     | 0.019                                     | -20                                    |
|         | 8.     | 0.81 | 0.029                                     | -3                                     | 0.028                                     | -19                                    |
|         | 9.     | 0.82 | 0.053                                     | -6                                     | 0.048                                     | -18                                    |
|         | 10.    | 4.29 | 0.029                                     | 4                                      | 0.032                                     | -17                                    |
|         | 11.    | 1.51 | 0.095                                     | 15                                     | 0.089                                     | 0                                      |
|         | 12.    | 0.61 | 0.078                                     | -12                                    | 0.085                                     | -23                                    |
|         | 13.    | 1.97 | 0.044                                     | 24                                     | 0.041                                     | -7                                     |
|         | 14.    | 0.45 | 0.094                                     | 16                                     | 0.097                                     | -4                                     |
|         | 15.    | 0.77 | 0.032                                     | -10                                    | 0.023                                     | -18                                    |

|          |         |      |                   |                 |                   |                 |
|----------|---------|------|-------------------|-----------------|-------------------|-----------------|
|          | 16.     | 0.59 | 0.1               | -6              | 0.087             | -17             |
|          | 17.     | 0.37 | 0.096             | -2              | 0.08              | -12             |
|          | Average |      | $0.058 \pm 0.028$ | $-0.3 \pm 9.8$  | $0.053 \pm 0.027$ | $-17.9 \pm 8.4$ |
| Batch II | 1.      | 0.7  | 0.035             | -5              | 0.032             | -20             |
|          | 2.      | 0.53 | 0.021             | -6              | 0.019             | -20             |
|          | 3.      | 0.78 | 0.057             | -19             | 0.056             | -31             |
|          | 4.      | 0.31 | 0.058             | -4              | 0.058             | -24             |
|          | 5.      | 0.6  | 0.039             | -6              | 0.031             | -26             |
|          | 6.      | 1.22 | 0.023             | -12             | 0.021             | -31             |
|          | 7.      | 1.75 | 0.034             | -14             | 0.019             | -29             |
|          | 8.      | 1.18 | 0.028             | -9              | 0.02              | -21             |
|          | 9.      | 0.52 | 0.029             | -4              | 0.024             | -25             |
|          | Average |      | $0.036 \pm 0.013$ | $-10.1 \pm 5.4$ | $0.031 \pm 0.015$ | $-25.2 \pm 4.4$ |

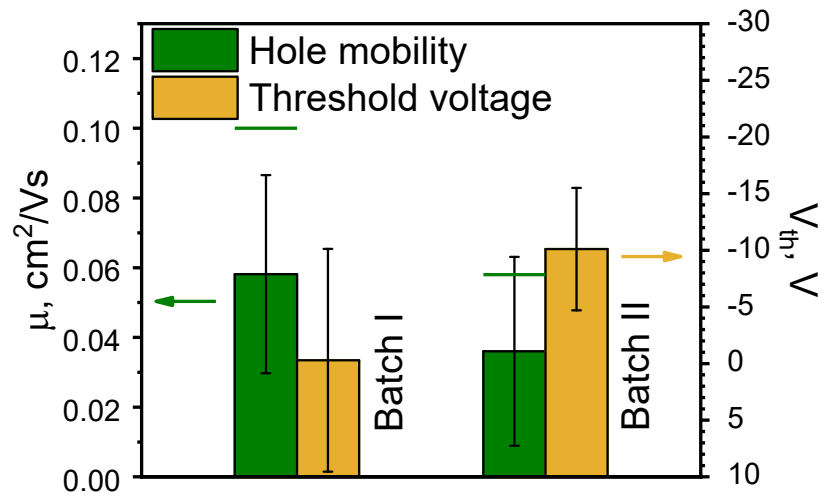

**Figure S19.** Average hole mobility and threshold voltage in saturation regime of C8-BPTE OFETs (Batch I and Batch II); the horizontal marks indicate the maximal values.
